# Supplementary material for: Luminescence, energy transfer, colour modulation and up-conversion mechanisms of Yb3+, Tm3+ and Ho3+ co-doped Y6MoO12
Source: Royal Society of Chemistry journal article supplement (doi:10.1039/d2ra05642a), 2022-01-01
Supplement: d2ra05642a1.pdf [file d2ra05642a1.pdf]

# **Luminescence, energy transfer, colour modulation and up-conversion mechanisms of Yb<sup>3+</sup>, Tm<sup>3+</sup> and Ho<sup>3+</sup> co-doped Y<sub>6</sub>MoO<sub>12</sub>**

Peng Guo <sup>a</sup>, Jiaxuan Wang <sup>a</sup>, Chuan Liao <sup>a</sup>, Haifeng Zhou <sup>b</sup>, Dapeng Huang <sup>a,\*</sup>,

Guangjun Zhou <sup>a,\*</sup>, Xiaoqiang Yu <sup>a</sup>, Jifan Hu <sup>a</sup>

<sup>a</sup> State Key Laboratory of Crystal Materials, Shandong University, Jinan, 250100, P. R. China.

<sup>b</sup> School of Materials Science and Engineering, Qilu University of Technology (Shandong Academy of Sciences), Jinan, 250353, P. R. China.

**\* Corresponding Author**

Email: gjzhou@sdu.edu.cn (G. J. Zhou); dapenghuang@sdu.edu.cn (D. P. Huang)

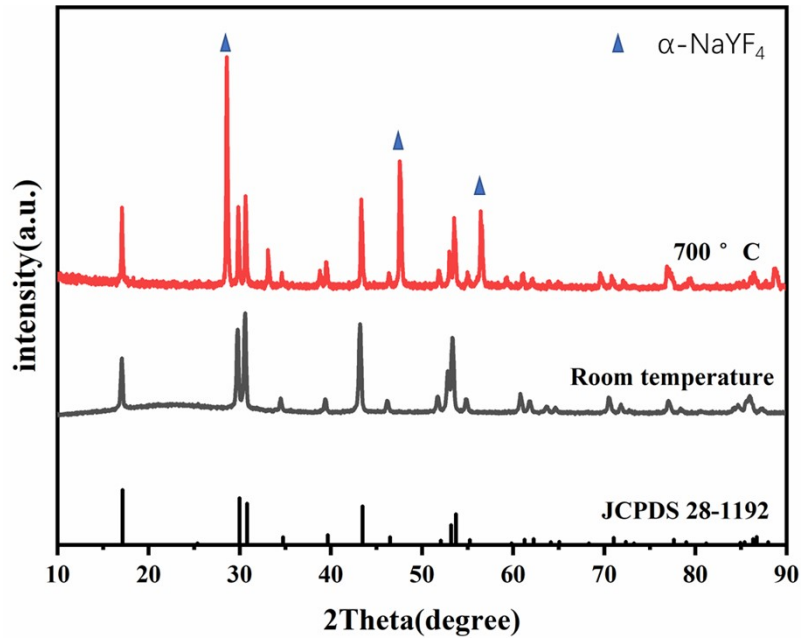

Fig.S1. X-ray diffraction patterns of NaYF<sub>4</sub> annealed at 700 °C and at room temperature

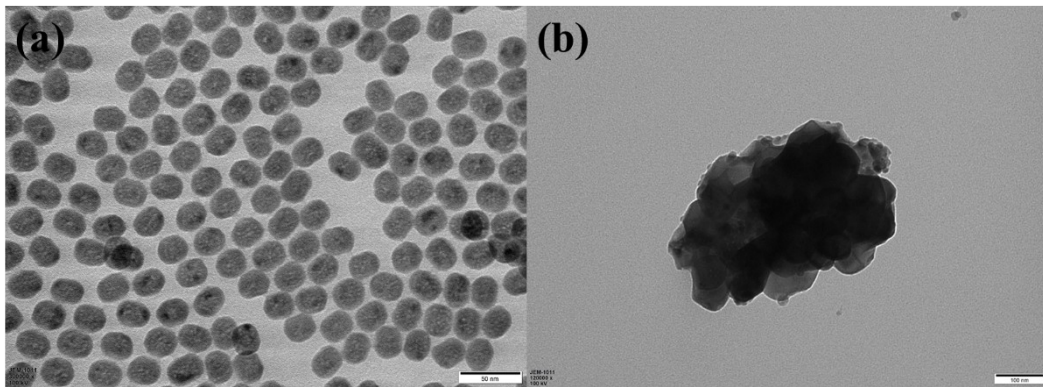

Fig.S2 The TEM images of NaYF<sub>4</sub> annealed at 700 °C and at room temperature

Table S1 Temperature sensing performance of several representative UC optical thermometric materials.

| <b>thermometric materials</b> | <b>T range (K)</b> | <b>Max. <math>S_A</math> (<math>K^{-1}</math>)</b> | <b>Max. <math>S_R</math> (% <math>K^{-1}</math>)</b> | <b>Ref.</b>      |
|-------------------------------|--------------------|----------------------------------------------------|------------------------------------------------------|------------------|
| <b>BaWO6:Yb:Er</b>            | <b>303-573</b>     | <b>0.0025</b>                                      | <b>1.21</b>                                          | <b>48</b>        |
| <b>Y2WO6:Yb:Er</b>            | <b>293-573</b>     | <b>0.0022</b>                                      | <b>0.1</b>                                           | <b>49</b>        |
| <b>SiO2:Er</b>                | <b>295-873</b>     | <b>0.001</b>                                       | <b>-</b>                                             | <b>50</b>        |
| <b>TeO2-WO2:Yb:Er</b>         | <b>300-690</b>     | <b>0.0028</b>                                      | <b>-</b>                                             | <b>51</b>        |
| <b>Gd2Mo3O9:Yb:Er</b>         | <b>300-460</b>     | <b>0.0105</b>                                      | <b>-</b>                                             | <b>52</b>        |
| <b>Y6MoO12:Yb:Tm:Ho</b>       | <b>298-498</b>     | <b>0.0032</b>                                      | <b>0.85</b>                                          | <b>This work</b> |
